# Supplementary material
Source: PubMed Central journal article supplement (PMC4590441)
Supplement: rspb20150260supp1.pdf [file rspb20150260supp1.pdf]

Table S1. List of genotyped individuals from ten selected colonies

| Colony | Locality | GPS                       | Date      | Primary queen | Neotenic queens <sup>a</sup> | Primary king | Workers | Soldiers | Nymphs (♂/♀) |
|--------|----------|---------------------------|-----------|---------------|------------------------------|--------------|---------|----------|--------------|
| A      | a        | N5°04.067'<br>W52°58.773' | 1/10/2012 | -             | 20 (100)                     | 1            | 15      | 0        | -            |
| B      | b        | N5°04.584'<br>W53°01.356' | 4/10/2012 | -             | 20 (64)                      | 1            | 20      | 18       | -            |
| C      | b        | N5°04.568'<br>W53°01.309' | 7/10/2012 | -             | 60 (71)                      | 1            | 14      | 15       | -            |
| D      | c        | N5°04.514'<br>W52°58.104' | 12/5/2013 | -             | 19 (128)                     | 1            | 20      | 15       | -            |
| E      | c        | N5°04.502'<br>W52°58.404' | 16/5/2013 | -             | 20 (130)                     | 1            | 19      | 20       | 10/8         |
| F      | c        | N5°04.534'<br>W52°58.436' | 18/5/2013 | -             | 20 (120)                     | 1            | 20      | 20       | 10/10        |
| G      | d        | N5°05.331'<br>W52°57.872' | 5/3/2014  | -             | 20 (44)                      | 1            | 20      | 20       | -            |
| H      | e        | N5°04.135'<br>W53°03.196' | 6/3/2014  | -             | 20 (44)                      | 1            | 20      | 20       | -            |
| I      | e        | N5°04.163'<br>W53°03.188' | 8/3/2014  | -             | 20 (35)                      | 1            | 20      | 20       | -            |
| J      | f        | N5°07.202'<br>W52°57.924' | 17/5/2013 | 1             | -                            | 1            | 20      | 11       | -            |

<sup>a</sup> Numbers in parentheses represent mature neotenic queens found in the colony

Table S2. Distances separating the ten selected colonies (km)

| Colony | B   | C     | D   | E     | F     | G   | H    | I     | J    |
|--------|-----|-------|-----|-------|-------|-----|------|-------|------|
| A      | 4.9 | 4.8   | 1.5 | 1.1   | 1.1   | 2.9 | 8.2  | 8.2   | 6.0  |
| B      |     | 0.092 | 5.8 | 5.5   | 5.4   | 6.6 | 3.5  | 3.5   | 8.0  |
| C      |     |       | 5.7 | 5.4   | 5.3   | 6.5 | 3.6  | 3.6   | 7.9  |
| D      |     |       |     | 0.423 | 0.446 | 1.4 | 9.2  | 9.2   | 4.8  |
| E      |     |       |     |       | 0.084 | 1.8 | 8.9  | 8.9   | 5.1  |
| F      |     |       |     |       |       | 1.8 | 8.8  | 8.8   | 5.0  |
| G      |     |       |     |       |       |     | 10.1 | 10.1  | 3.5  |
| H      |     |       |     |       |       |     |      | 0.054 | 11.3 |
| I      |     |       |     |       |       |     |      |       | 11.2 |



## ELECTRONIC SUPPLEMENTARY MATERIAL

| Colony                 | Caste                             | Locus           |                 |                 |                 |                |
|------------------------|-----------------------------------|-----------------|-----------------|-----------------|-----------------|----------------|
|                        |                                   | En-11           | En-10           | En-08           | En-19           | En-15          |
| D                      | primary queen (inferred)          | 162/162         | 113/113         | 157/167         | 193/193         | 286/286        |
|                        | primary king (inferred/genotyped) | <b>158/166</b>  | <b>111/113</b>  | 157/ <b>171</b> | 193/ <b>197</b> | 286/286        |
|                        | workers/soldiers - alleles        | 3               | 2               | 3               | 2               | 1              |
|                        | genotypes (35)                    | <b>158/162</b>  | 113/113         | 157/157         | 193/ <b>197</b> | 286/286        |
|                        |                                   | 162/ <b>166</b> | <b>111/113</b>  | 157/167         | 193/193         |                |
|                        |                                   |                 |                 | 157/ <b>171</b> |                 |                |
|                        |                                   |                 |                 | 167/ <b>171</b> |                 |                |
|                        | neotenic females - alleles        | 2               | 1               | 2               | 1               | 1              |
|                        | genotypes (19)                    | 162/162         | 113/113         | 157/167         | 193/193         | 286/286        |
|                        |                                   |                 |                 | 157/157         |                 |                |
| E                      | primary queen (inferred)          | 162/162         | 103/103         | 157/157         | 177/177         | 292/292        |
|                        | primary king (inferred/genotyped) | 162/ <b>166</b> | <b>113/113</b>  | 157/157         | <b>193/193</b>  | 286/292        |
|                        | workers/soldiers - alleles        | 2               | 2               | 1               | 2               | 2              |
|                        | genotypes (39)                    | 162/162         | 103/ <b>113</b> | 157/157         | 177/ <b>193</b> | 292/292        |
|                        |                                   | 162/ <b>166</b> |                 |                 |                 | <b>286/292</b> |
|                        | neotenic females - alleles        | 1               | 1               | 1               | 1               | 1              |
|                        | genotypes (20)                    | 162/162         | 103/103         | 157/157         | 177/177         | 292/292        |
|                        | nymphs females - alleles          | 2               | 2               | 1               | 2               | 2              |
|                        | genotypes (8)                     | 162/162         | 103/ <b>113</b> | 157/157         | 177/ <b>193</b> | 292/292        |
|                        |                                   | 162/ <b>166</b> | 103/103         |                 | 177/177         | <b>286/292</b> |
| nymphs males - alleles | 2                                 | 2               | 1               | 2               | 2               |                |
| genotypes (10)         | 162/162                           | 103/ <b>113</b> | 157/157         | 177/ <b>193</b> | 292/292         |                |
|                        | 162/ <b>166</b>                   |                 |                 |                 | <b>286/292</b>  |                |

## ELECTRONIC SUPPLEMENTARY MATERIAL

| Colony | Caste                             | Locus          |                 |         |                |         |
|--------|-----------------------------------|----------------|-----------------|---------|----------------|---------|
|        |                                   | En-11          | En-10           | En-08   | En-19          | En-15   |
| F      | primary queen (inferred)          | 162/166        | 103/103         | 157/167 | 193/195        | 286/286 |
|        | primary king (inferred/genotyped) | <b>158/162</b> | <b>113/115</b>  | 157/167 | <b>191/193</b> | 286/286 |
|        | workers/soldiers - alleles        | 3              | 3               | 2       | 3              | 1       |
|        | genotypes (40)                    | <b>158/162</b> | 103/ <b>115</b> | 167/167 | 193/195        | 286/286 |
|        |                                   | 162/166        | 103/ <b>113</b> | 157/167 | <b>191/195</b> |         |
|        |                                   | <b>158/166</b> |                 | 157/157 | 193/193        |         |
|        |                                   | 162/162        |                 |         | <b>191/193</b> |         |
|        | neotenic females - alleles        | 2              | 1               | 2       | 2              | 1       |
|        | genotypes (20)                    | 162/166        | 103/103         | 157/167 | 193/195        | 286/286 |
|        | nymphs females - alleles          | 3              | 3               | 2       | 3              | 1       |
|        | genotypes (10)                    | 162/166        | 103/ <b>115</b> | 167/167 | 193/195        | 286/286 |
|        |                                   | <b>158/166</b> | 103/ <b>113</b> | 157/167 | <b>191/195</b> |         |
|        |                                   | <b>158/162</b> | 103/103         | 157/157 | 193/193        |         |
|        |                                   |                |                 |         | <b>191/193</b> |         |
|        | nymphs males - alleles            | 3              | 3               | 2       | 3              | 1       |
|        | genotypes (10)                    | <b>158/166</b> | 103/ <b>115</b> | 167/167 | <b>191/195</b> | 286/286 |
|        |                                   | 162/162        | 103/ <b>113</b> | 157/167 | 193/193        |         |
|        |                                   | 162/166        |                 | 157/157 | <b>191/193</b> |         |

| Colony | Caste                             | Locus   |         |                 |                 |                 |
|--------|-----------------------------------|---------|---------|-----------------|-----------------|-----------------|
|        |                                   | En-11   | En-10   | En-08           | En-19           | En-15           |
| G      | primary queen (inferred)          | 162/166 | 103/103 | 157/157         | 191/193         | 284/286         |
|        | primary king (inferred/genotyped) | 162/166 | 103/103 | <b>169/169</b>  | 193/ <b>195</b> | 286/ <b>292</b> |
|        | workers/soldiers - alleles        | 2       | 1       | 2               | 3               | 3               |
|        | genotypes (40)                    | 162/166 | 103/103 | 157/ <b>169</b> | 191/193         | 286/286         |
|        |                                   | 162/162 |         |                 | 193/ <b>195</b> | 284/ <b>292</b> |
|        |                                   | 166/166 |         |                 | 191/ <b>195</b> | 284/286         |
|        |                                   |         |         |                 | 193/193         | 286/ <b>292</b> |
|        | neotenic females - alleles        | 2       | 1       | 1               | 2               | 2               |
|        | genotypes (20)                    | 162/166 | 103/103 | 157/157         | 191/193         | 284/286         |
|        |                                   | 162/162 |         |                 |                 |                 |

## ELECTRONIC SUPPLEMENTARY MATERIAL

| Colony   | Caste                                    | Locus   |         |         |                 |                |
|----------|------------------------------------------|---------|---------|---------|-----------------|----------------|
|          |                                          | En-11   | En-10   | En-08   | En-19           | En-15          |
| <b>H</b> | <b>primary queen</b> (inferred)          | 162/164 | 113/113 | 157/157 | 177/177         | 286/292        |
|          | <b>primary king</b> (inferred/genotyped) | 162/162 | 113/113 | 157/157 | <b>191/193</b>  | <b>284/286</b> |
|          | <b>workers/soldiers</b> - alleles        | 2       | 1       | 1       | 3               | 3              |
|          | genotypes (40)                           | 162/162 | 113/113 | 157/157 | 177/ <b>193</b> | 286/286        |
|          |                                          | 162/164 |         |         | 177/ <b>191</b> | 286/292        |
|          |                                          |         |         |         |                 | <b>284/292</b> |
|          |                                          |         |         |         |                 | <b>284/286</b> |
|          | <b>neotenic females</b> - alleles        | 2       | 1       | 1       | 1               | 2              |
|          | genotypes (20)                           | 162/164 | 113/113 | 157/157 | 177/177         | 286/292        |
|          |                                          |         |         |         |                 | 292/292        |

| Colony   | Caste                                    | Locus           |                 |                 |         |                |
|----------|------------------------------------------|-----------------|-----------------|-----------------|---------|----------------|
|          |                                          | En-11           | En-10           | En-08           | En-19   | En-15          |
| <b>I</b> | <b>primary queen</b> (inferred)          | 162/166         | 113/135         | 157/157         | 193/193 | 292/292        |
|          | <b>primary king</b> (inferred/genotyped) | 162/ <b>170</b> | <b>103/117</b>  | 157/ <b>169</b> | 193/193 | <b>286/292</b> |
|          | <b>workers/soldiers</b> - alleles        | 3               | 4               | 2               | 1       | 2              |
|          | genotypes (40)                           | 162/162         | <b>117/135</b>  | 157/157         | 193/193 | 292/292        |
|          |                                          | 166/ <b>170</b> | <b>103/135</b>  | 157/ <b>169</b> |         | <b>286/292</b> |
|          |                                          | 162/166         | 113/ <b>117</b> |                 |         |                |
|          |                                          | 162/ <b>170</b> | <b>103/113</b>  |                 |         |                |
|          | <b>neotenic females</b> - alleles        | 2               | 2               | 1               | 1       | 1              |
|          | genotypes (20)                           | 162/166         | 113/135         | 157/157         | 193/193 | 292/292        |

| Colony   | Caste                                     | Locus   |                 |                 |         |                 |
|----------|-------------------------------------------|---------|-----------------|-----------------|---------|-----------------|
|          |                                           | En-11   | En-10           | En-08           | En-19   | En-15           |
| <b>J</b> | <b>primary queen</b> (inferred/genotyped) | 162/162 | 103/119         | 157/167         | 193/193 | 284/286         |
|          | <b>primary king</b> (inferred/genotyped)  | 162/162 | 103/ <b>113</b> | 157/ <b>169</b> | 193/193 | 286/ <b>288</b> |
|          | <b>workers/soldiers</b> - alleles         | 1       | 3               | 3               | 1       | 3               |
|          | genotypes (31)                            | 162/162 | <b>113/119</b>  | 167/ <b>169</b> | 193/193 | 284/286         |
|          |                                           |         | 103/ <b>113</b> | 157/167         |         | 286/ <b>288</b> |
|          |                                           |         | 103/119         | 157/ <b>169</b> |         | 286/286         |
|          |                                           |         | 103/103         | 157/157         |         | 284/ <b>288</b> |
